# Supplementary material for: Community and Proteomic Analysis of Anaerobic Consortia Converting Tetramethylammonium to Methane
Source: Hindawi journal article supplement (doi:10.1155/2017/2170535), 2017-01-01
Supplement: f1 [file 2170535.f1.pdf]

**Community and Proteomic Analysis of Anaerobic Consortia Converting  
Tetramethylammonium to Methane**

Wei-Yu Chen<sup>1</sup>, Lucia Kraková<sup>2</sup>, Jer-Horng Wu<sup>1\*</sup>, Domenico Pangallo<sup>2</sup>, Lenka Jeszeová<sup>2</sup>, Bing Liu<sup>3</sup>, Hidenari Yasui<sup>3</sup>

<sup>1</sup>Department of Environmental Engineering, National Cheng Kung University, No.1, University Road, East District, Tainan City 701, Taiwan (ROC)

<sup>2</sup>Institute of Molecular Biology, Slovak Academy of Sciences, Dubravska cesta 21, 84551 Bratislava, Slovakia

<sup>3</sup>Faculty of Environmental Engineering, The University of Kitakyushu, 1-1, Hibikino, Wakamatsu, Kitakyushu, Japan 808-0135

**Table S1** Annotation of proteins related to the conversion of methylamines by the methanogens in the CMJP sample analyzed in this study.

| Accession  | Organism                              | gene            | Annotation                                                          | Coverage (%) | Peptides (#) | Relative abundance (%) |
|------------|---------------------------------------|-----------------|---------------------------------------------------------------------|--------------|--------------|------------------------|
| A0A0E3SIM3 | Methanosarcina barkeri 3              | MSBR3_0618      | Dimethylamine:corrinoic methyltransferase                           | 17.13        | 21           | 1.39                   |
| A0A0E3Q5F5 | Methanosarcina vacuolata Z-761        | MSVAZ_1366      | Methanol methyltransferase corrinoic protein                        | 12.94        | 15           | 0.28                   |
| A0A0E3P0I6 | Methanosarcina siciliae T4/M          | MSSIT_0113      | Monomethylamine:corrinoic methyltransferase                         | 23.58        | 20           | 0.48                   |
| A0A0E3WTL8 | Methanosarcina lacustris Z-7289       | MSLAZ_3204      | Monomethylamine:corrinoic methyltransferase                         | 15.94        | 9            | 0.24                   |
| A0A0E3KRC1 | Methanosarcina thermophila CHTI-55    | MSTHC_1357      | Monomethylamine:corrinoic methyltransferase                         | 18.12        | 10           | 0.22                   |
| A0A0E3WT78 | Methanosarcina lacustris Z-7289       | MSLAZ_2479      | Dimethylamine methyltransferase corrinoic protein                   | 25.00        | 11           | 0.13                   |
| A0A0E3Q3C8 | Methanosarcina vacuolata Z-761        | MSVAZ_0479      | Trimethylamine methyltransferase corrinoic protein                  | 17.05        | 6            | 0.09                   |
| A0A0E3RQP4 | Methanosarcina mazei LYC              | MSMAL_2486      | Trimethylamine:corrinoic methyltransferase / pyrrolysine-containing | 18.32        | 10           | 0.10                   |
| A0A0E3Q2X7 | Methanosarcina vacuolata Z-761        | MSVAZ_0478      | Trimethylamine:corrinoic methyltransferase                          | 11.92        | 7            | 0.08                   |
| A0A0E3P3C2 | Methanosarcina siciliae T4/M          | MSSIT_1254      | Methanol:corrinoic methyltransferase                                | 5.64         | 5            | 0.07                   |
| A0A0G3CI53 | Methanosarcina barkeri CM1            | MCM1_3452       | Methylcobalamin:coenzyme M methyltransferase                        | 9.14         | 4            | 0.04                   |
| A0A0P0IVU9 | Methanosarcina sp. 795                | AAAY43_03680    | Monomethylamine corrinoic protein 1                                 | 10.60        | 3            | 0.02                   |
| A0A1E7GC69 | Methanosarcina sp. Ant1               | BGV40_08935     | Dimethylamine corrinoic protein 3                                   | 13.43        | 7            | 0.10                   |
| A0A0F8D0L8 | Methanosarcina sp. 2.H.T.1A.6         | EO98_01420      | Dimethylamine corrinoic protein 3                                   | 11.11        | 8            | 0.12                   |
| A0A1B8X0V8 | Methanohalophilus sp. DAL1            | A9957_09265     | Trimethylamine:corrinoic methyltransferase                          | 6.91         | 5            | 0.07                   |
| K4MEZ0     | Methanobrevibacter psychrophilus R15  | Mpsy_1677       | Monomethylamine corrinoic methyltransferase                         | 15.92        | 17           | 0.45                   |
| W9DRF0     | Methanobrevibacter tindarius DSM 2278 | MettiDRAFT_1545 | Methyltransferase cognate corrinoic protein                         | 24.40        | 11           | 0.13                   |
| K4MCC1     | Methanobrevibacter psychrophilus R15  | Mpsy_0908       | Methanol corrinoic protein                                          | 13.83        | 7            | 0.14                   |
| A0A139CSW5 | Methanobrevibacter sp. T82-4          | AWU59_702       | Methanol corrinoic methyltransferase                                | 6.07         | 5            | 0.07                   |
| F7XQH1     | Methanosalsum zhilinae                | Mzhil_0605      | Dimethylamine---corrinoic protein Co-methyltransferase              | 16.52        | 13           | 1.27                   |
| F7XPR5     | Methanosalsum zhilinae                | Mzhil_0461      | Methyltransferase cognate corrinoic protein                         | 17.59        | 12           | 0.19                   |
| F7XPR4     | Methanosalsum zhilinae                | Mzhil_0460      | Trimethylamine methyltransferase                                    | 9.59         | 2            | 0.01                   |

**Table S2** Annotation of proteins related to the conversion of methylamines, methanogenesis and nitrogen metabolism in *Methanomethylorans hollandica* detected in the CMJP sample in this study.

| Accession | gene | Annotation                                                                           | Coverage (%) | Peptides (#) | Relative abundance (%) | Pathway        |
|-----------|------|--------------------------------------------------------------------------------------|--------------|--------------|------------------------|----------------|
| L0KUI1    | mttB | Trimethylamine:corrinoide methyltransferase                                          | 59.48        | 114          | 1.87                   | Methylotrophic |
| L0KT96    | mttC | Trimethylamine corrinoide protein                                                    | 27.44        | 17           | 0.16                   | Methylotrophic |
| L0L090    | mttC | Trimethylamine corrinoide protein                                                    | 14.35        | 4            | 0.03                   | Methylotrophic |
| L0KTA2    | mtbB | Dimethylamine:corrinoide methyltransferase                                           | 60.52        | 100          | 2.93                   | Methylotrophic |
| L0KX52    | mtbC | Dimethylamine corrinoide protein                                                     | 51.40        | 34           | 0.39                   | Methylotrophic |
| L0KUG6    | mtbA | methyl-Co(III) methylamine-specific corrinoide protein]:coenzyme M methyltransferase | 28.61        | 20           | 0.19                   | Methylotrophic |
| L0KT85    | mtmB | Monomethylamine:corrinoide methyltransferase                                         | 51.75        | 90           | 2.54                   | Methylotrophic |
| L0KSD3    | mtmC | Monomethylamine corrinoide protein                                                   | 39.35        | 25           | 0.23                   | Methylotrophic |
| L0KWJ7    | mtmB | Monomethylamine:corrinoide methyltransferase                                         | 8.32         | 3            | 0.01                   | Methylotrophic |
| L0KWE8    | mtaA | Methyltransferase, MtaA/CmuA family(methanol-specific corrinoide protein)            | 43.07        | 56           | 0.93                   | Methylotrophic |
| L0KY68    | mtaC | Methanol corrinoide protein                                                          | 48.62        | 31           | 0.36                   | Methylotrophic |
| L0KYG3    | mtaB | Methanol-cobalamin methyltransferase B subunit                                       | 36.07        | 37           | 0.29                   | Methylotrophic |
| L0KYQ5    | mtaC | Methanol corrinoide protein                                                          | 5.91         | 2            | 0.01                   | Methylotrophic |
| L0KYC2    | fwdA | Formylmethanofuran dehydrogenase subunit A                                           | 55.14        | 79           | 0.76                   | CO2 reduction  |
| L0KWB0    | fwdC | Formylmethanofuran dehydrogenase subunit C                                           | 50.19        | 43           | 0.45                   | CO2 reduction  |
| L0KU81    | fwdB | Formylmethanofuran dehydrogenase subunit B                                           | 31.72        | 37           | 0.40                   | CO2 reduction  |
| L0KY21    | fwdF | NADH:ubiquinone oxidoreductase chain I-like protein                                  | 47.06        | 32           | 0.30                   | CO2 reduction  |
| L0KV15    | fwdD | Formylmethanofuran dehydrogenase subunit D                                           | 44.70        | 13           | 0.09                   | CO2 reduction  |
| L0KX24    | fwdB | Formylmethanofuran dehydrogenase subunit B                                           | 22.71        | 14           | 0.09                   | CO2 reduction  |
| L0KXC2    | fwdF | NADH:ubiquinone oxidoreductase chain I-like protein                                  | 9.13         | 6            | 0.04                   | CO2 reduction  |
| L0KXZ1    | fwdD | Formylmethanofuran dehydrogenase subunit D                                           | 14.18        | 2            | 0.01                   | CO2 reduction  |
| L0L0T0    | fwdG | 4Fe-4S ferredoxin                                                                    | 11.18        | 2            | 0.01                   | CO2 reduction  |
| L0L2E9    | ftt  | Formylmethanofuran--tetrahydromethanopterin formyltransferase                        | 44.30        | 56           | 0.86                   | CO2 reduction  |
| L0KYG6    | mch  | Methenyltetrahydromethanopterin cyclohydrolase                                       | 42.50        | 20           | 0.21                   | CO2 reduction  |
| L0KTR5    | mtd  | F420-dependent methylenetetrahydromethanopterin dehydrogenase                        | 38.69        | 18           | 0.15                   | CO2 reduction  |
| L0L1X7    | mer  | 5,10-methylenetetrahydromethanopterin reductase                                      | 52.76        | 38           | 0.41                   | CO2 reduction  |

|        |         |                                                                         |       |     |      |               |
|--------|---------|-------------------------------------------------------------------------|-------|-----|------|---------------|
| L0L001 | mtrH    | N5-methyltetrahydromethanopterin:coenzyme M methyltransferase subunit H | 34.59 | 34  | 0.56 | CO2 reduction |
| L0L1V0 | mtrB    | Tetrahydromethanopterin S-methyltransferase subunit B                   | 28.97 | 13  | 0.12 | CO2 reduction |
| L0L1I6 | mtrA    | Tetrahydromethanopterin S-methyltransferase subunit A                   | 47.30 | 23  | 0.19 | CO2 reduction |
| L0KYS5 | mtrG    | Tetrahydromethanopterin S-methyltransferase subunit G                   | 65.79 | 11  | 0.07 | CO2 reduction |
| L0KXS5 | mtrE    | Tetrahydromethanopterin S-methyltransferase subunit E                   | 22.59 | 11  | 0.06 | CO2 reduction |
| L0KXS0 | mtrF    | Tetrahydromethanopterin S-methyltransferase subunit F                   | 33.77 | 3   | 0.03 | CO2 reduction |
| L0KYT1 | mtrD    | Tetrahydromethanopterin S-methyltransferase subunit D                   | 10.80 | 4   | 0.02 | CO2 reduction |
| L0L1E2 | ACSS    | Acetyl-CoA synthetase                                                   | 9.53  | 10  | 0.06 | Acetotrophic  |
| L0KWP3 | ACSS    | Acetyl-CoA synthetase                                                   | 5.02  | 4   | 0.02 | Acetotrophic  |
| L0L0Q6 | ACSS    | Acetyl-CoA synthetase                                                   | 2.39  | 2   | 0.01 | Acetotrophic  |
| L0KVQ7 | cdhC    | Acetyl-CoA decarbonylase/synthase complex subunit beta                  | 42.86 | 39  | 0.31 | Acetotrophic  |
| L0KYY5 | cdhA    | Acetyl-CoA decarbonylase/synthase complex subunit alpha                 | 36.07 | 56  | 0.58 | Acetotrophic  |
| L0KWZ4 | cdhB    | Acetyl-CoA decarbonylase/synthase complex subunit epsilon               | 17.16 | 18  | 0.19 | Acetotrophic  |
| L0KYR3 | cdhD    | Acetyl-CoA decarbonylase/synthase complex subunit delta                 | 15.96 | 13  | 0.10 | Acetotrophic  |
| L0KYY9 | cdhE    | Acetyl-CoA decarbonylase/synthase complex subunit gamma                 | 21.96 | 11  | 0.14 | Acetotrophic  |
| L0L0H0 | mcrA    | S2. reductase subunit alpha                                             | 60.77 | 192 | 4.76 | CH4 formation |
| L0L0T9 | mcrB    | Methyl-coenzyme M reductase, beta subunit                               | 60.74 | 98  | 2.99 | CH4 formation |
| L0KWQ4 | mcrG    | Methyl-coenzyme M reductase, gamma subunit                              | 66.67 | 55  | 1.60 | CH4 formation |
| L0KYV7 | mcrD    | Methyl-coenzyme M reductase operon protein D                            | 39.13 | 6   | 0.05 | CH4 formation |
| L0KZB0 | hdrA    | Polyferredoxin, heterodixulfide reductase subunit A                     | 9.80  | 7   | 0.04 | CH4 formation |
| L0L027 | hdrE    | Heterodisulfide reductase subunit E                                     | 39.13 | 6   | 0.05 | CH4 formation |
| L0L0B9 | hdrD    | Heterodisulfide reductase subunit D (Fe-S oxidoreductase)               | 23.19 | 11  | 0.11 | CH4 formation |
| L0KWW2 | cooS    | Carbon-monoxide dehydrogenase, catalytic subunit                        | 49.53 | 67  | 0.85 | Miscellaneous |
| L0KY87 |         | Coenzyme F420-reducing hydrogenase, beta subunit                        | 34.40 | 16  | 0.15 | Miscellaneous |
| L0L246 |         | Hydrogenase maturation factor                                           | 8.37  | 5   | 0.04 | Miscellaneous |
| L0L062 |         | F420H2 dehydrogenase subunit FpoO                                       | 15.83 | 2   | 0.01 | Miscellaneous |
| L0KUU0 |         | CO dehydrogenase maturation factor                                      | 27.20 | 12  | 0.17 | Miscellaneous |
| L0KYE3 | GLUD1_2 | Glutamate dehydrogenase                                                 | 29.64 | 18  | 0.13 | N metabolism  |
| L0KT19 | glnA    | Glutamine synthetase, type I                                            | 34.16 | 33  | 0.23 | N metabolism  |
| L0KZ19 | hcp     | Hydroxylamine reductase                                                 | 23.71 | 27  | 0.19 | N metabolism  |
| L0KU78 | hcp     | Hydroxylamine reductase                                                 | 6.68  | 12  | 0.17 | N metabolism  |
| L0KW74 |         | NAD(P)H-nitrite reductase                                               | 51.14 | 40  | 1.02 | N metabolism  |

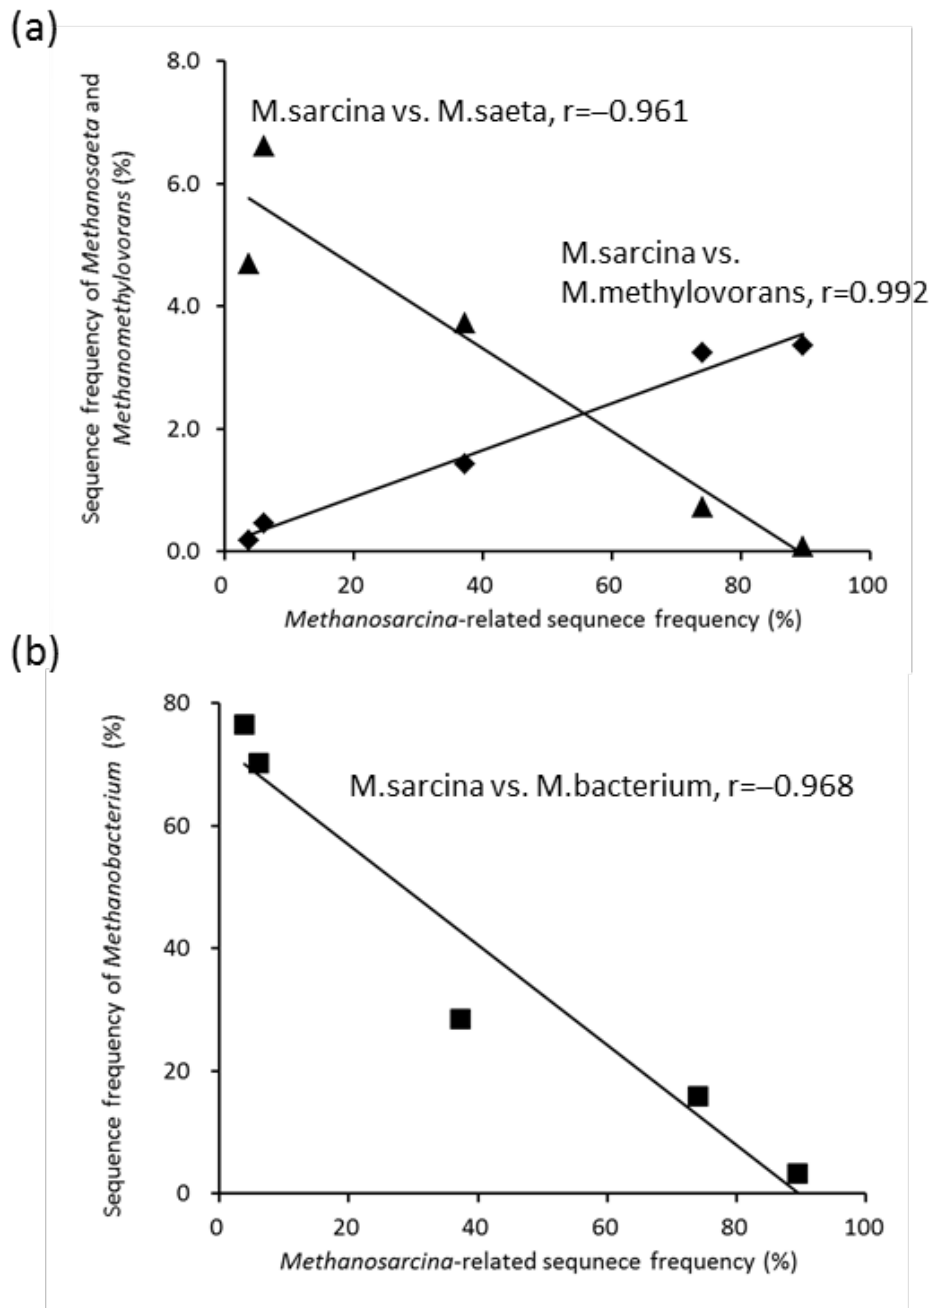

**Figure S1.** (a) Correlation of *Methanosarcina* vs. *Methanosaeta* and *Methanomethylovorans*. (b) Correlation of *Methanosarcina* vs. *Methanobacterium*. The lowercase, “r” denotes Pearson coefficient.

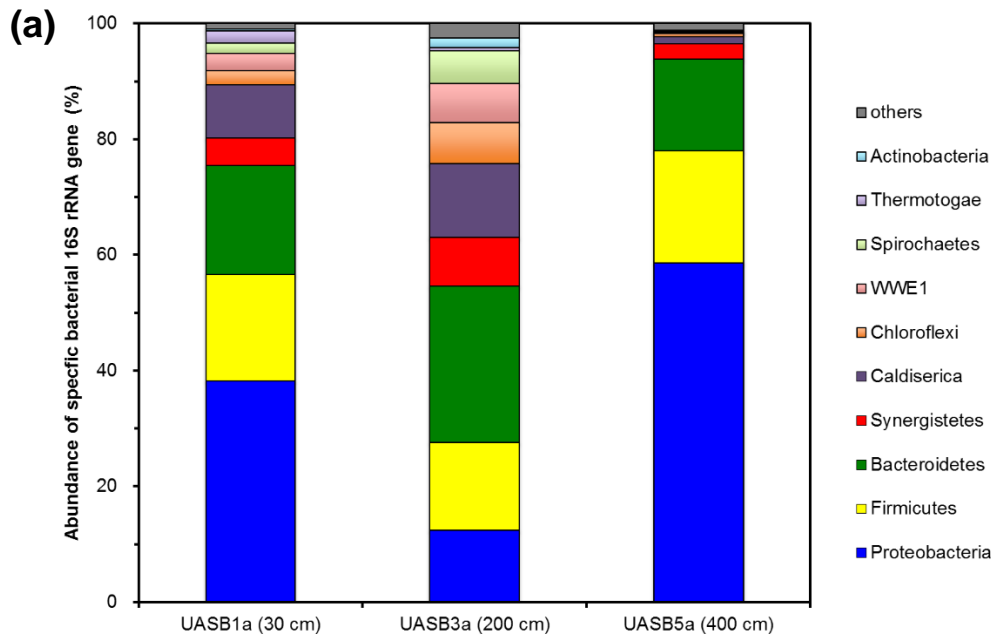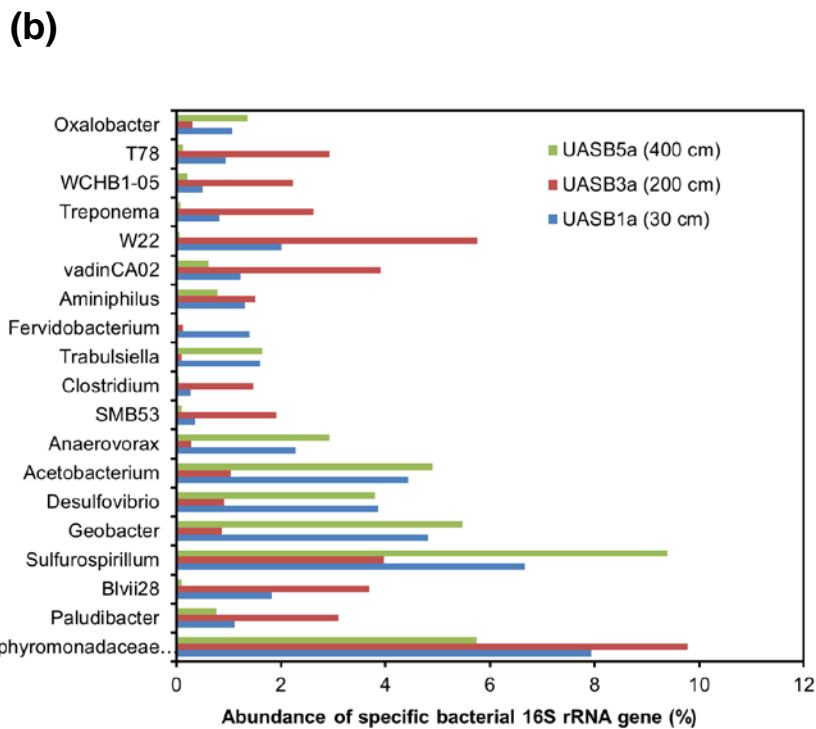

**Figure S2.** High-throughput sequencing analysis of bacterial 16S rRNA sequences of sludge samples taken from different heights (30cm, 200cm, and 400 cm) of a full-scale UASB reactor treating tetramethylammonium-rich wastewater. (a) Distribution of bacterial phylum-level taxa, and (b) distribution of dominant bacterial genera/groups (sequence abundance >1%).

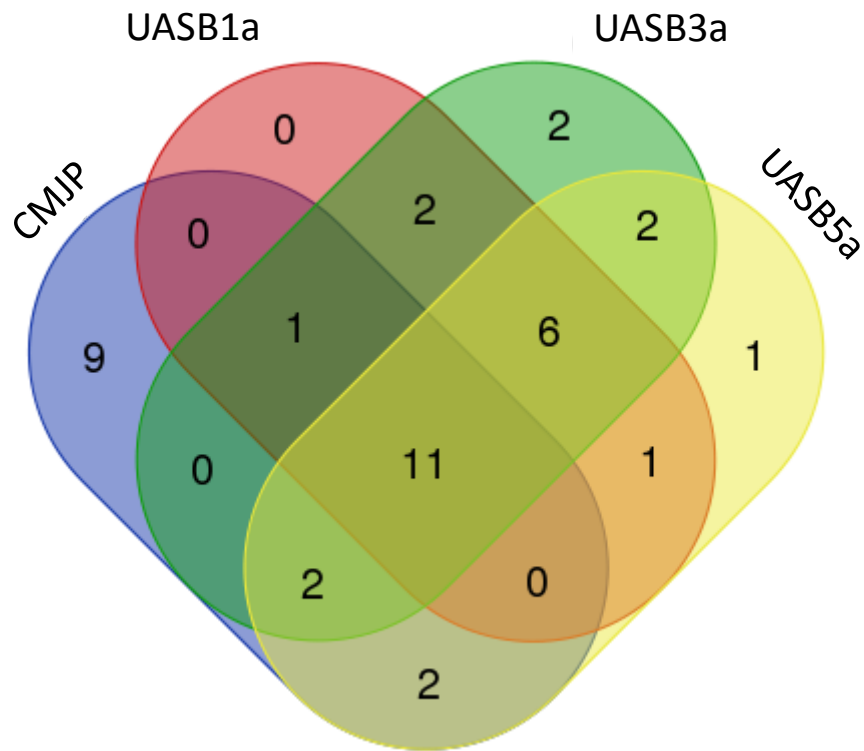

**Figure S3.** Venn diagram analysis of bacterial phyla detected with CMJP and UASB samples. Common phyla (shared by CMJP and UASB samples): *Proteobacteria*, *Spirochaetes*, *Synergistetes*, *Bacteroidetes*, *Acidobacteria*, *Thermotogae*, *Actinobacteria*, *Planctomycetes*, *Firmicutes*, *Chloroflexi*, and *Chlorobi*. CMJP specific phyla: *Hydrogenedentes*, *Candidatus Saccharibacteria*, *Ignavibacteriae*, *Tenericutes*, BRC1, *Elusimicrobia*, *Cloacimonetes*, *Aminicenantes*, and *Microgenomates*. UASB specific phyla: *Fusobacteria*, WPS-2, WS6, *Lentisphaerae*, WWE1, *Caldiserica*, NKB19, OP8, OP9, OP11, TM7, OD1, TM6, and *Deferribacteres*.

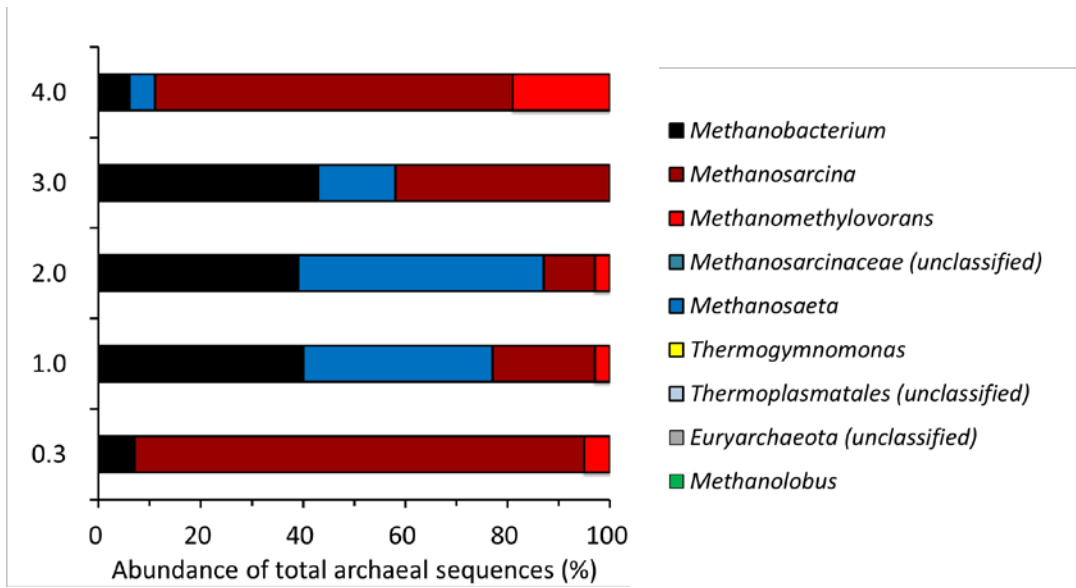

**Figure S4.** Quantitative distribution of archaeal populations in the full-scale UASB reactor for treating tetramethylammonium-rich wastewater as revealed by a DGGE-cloning approach.



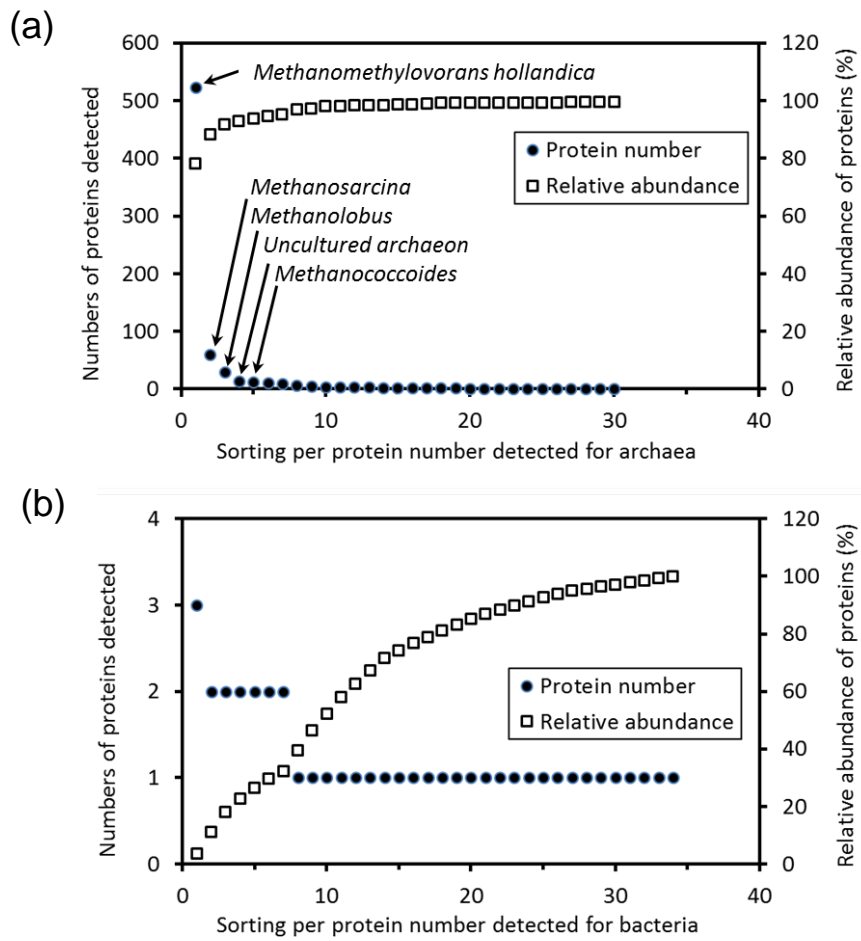

**Figure S5.** Numerical distribution and accumulated relative abundance of the identified proteins from (a) archaeal and (b) bacterial members in the sludge sampled from a tetramethylammonium-degrading CMSS reactor.

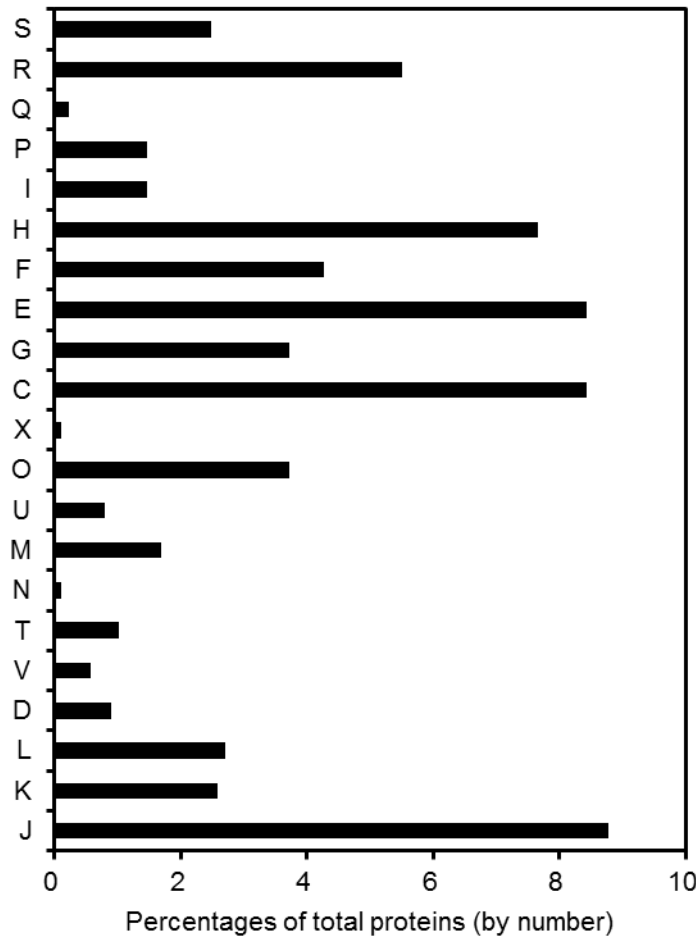

**Figure S6** Distribution of the identified proteins assigned to the functional categories based on cluster of orthologous groups (COG) classification. (Symbols, **J**: Translation, ribosomal structure and biogenesis; **K**: Transcription; **L**: Replication, recombination and repair; **D**: Cell cycle control, cell division, chromosome partitioning; **V**: Defense mechanisms; **T**: Signal transduction mechanisms; **N**: Cell motility; **M**: Cell wall/membrane/envelope biogenesis; **U**: Intracellular trafficking, secretion, and vesicular transport; **O**: Posttranslational modification, protein turnover, chaperones; **X**: Mobilome: prophages, transposons; **C**: Energy production and conversion; **G**: Carbohydrate transport and metabolism; **E**: Amino acid transport and metabolism; **F**: Nucleotide transport and metabolism; **H**: Coenzyme transport and metabolism; **I**: Lipid transport and metabolism; **P**: Inorganic ion transport and metabolism; **Q**: Secondary metabolites biosynthesis, transport and catabolism; **R**: General function prediction only; **S**: Function unknown;
